# Supplementary material for: Evaluation of selected tropical marine microalgal cultures for use in biophotovoltaic platforms
Source: Springer Nature journal article supplement (doi:10.1007/s00253-023-12951-0), 2024-01-09
Supplement: MOESM1 [file 253_2023_12951_MOESM1_ESM.pdf]

## **Supplementary data**

### **Evaluation of selected tropical marine microalgal cultures for use in biophotovoltaic**

Zoe Hui-Yee Tay<sup>a</sup>, Fong-Lee Ng<sup>b,c\*</sup>, Cheng-Han Thong<sup>b,d</sup>, Choon-Weng Lee<sup>a,b</sup>, G. Gnana kumar<sup>e,f</sup>, Abdullah G. Al-Sehemi<sup>g</sup>, Siew-Moi Phang<sup>b,h\*</sup>

<sup>a</sup>Institute of Biological Sciences, Faculty of Science, Universiti Malaya, Kuala Lumpur, Malaysia

<sup>b</sup>Institute of Ocean and Earth Sciences (IOES), Universiti Malaya, Kuala Lumpur, Malaysia

<sup>c</sup>School of Biosciences, Taylor's University, Lakeside Campus, 47500, Subang Jaya, Selangor Darul Ehsan, Malaysia

<sup>d</sup>Institute for Advanced Studies (IAS), Universiti Malaya, Kuala Lumpur, Malaysia

<sup>e</sup>Department of Physical Chemistry, School of Chemistry, Madurai Kamaraj University, Madurai-625021, Tamil Nadu, India

<sup>f</sup>Faculty of Engineering Technology & Built Environment, UCSI University, Kuala Lumpur 56000, Malaysia

<sup>g</sup>Research Center for Advanced Materials Science (RCAMS), King Khalid University, Abha, 61413, Saudi Arabia

<sup>h</sup>Faculty of Applied Sciences, UCSI University, Kuala Lumpur, Malaysia

\* Corresponding authors

E-mail: phang@um.edu.my; +603-79674610

& fonglee\_ng@yahoo.com; +603-79674610

**Figure S1** Fv/Fm values of all four strains on Days 0, 4, 8 and 12 of the experiment; data as means  $\pm$  S.D. (n = 5)

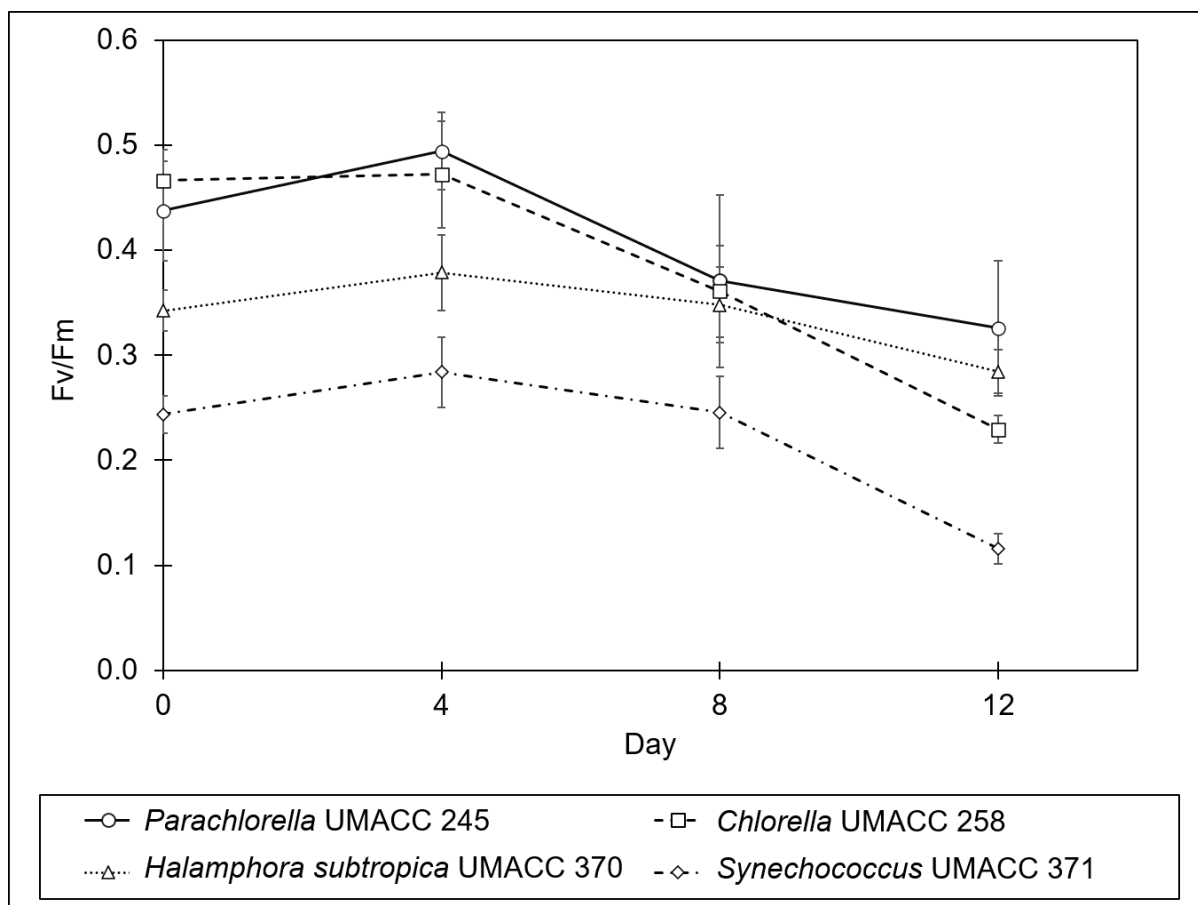

**Figure S2** Comparison of the alpha values between the microalgal strains on Days 0, 4, 8 and 12 of the experiment; data as means  $\pm$  S.D. (n = 5)

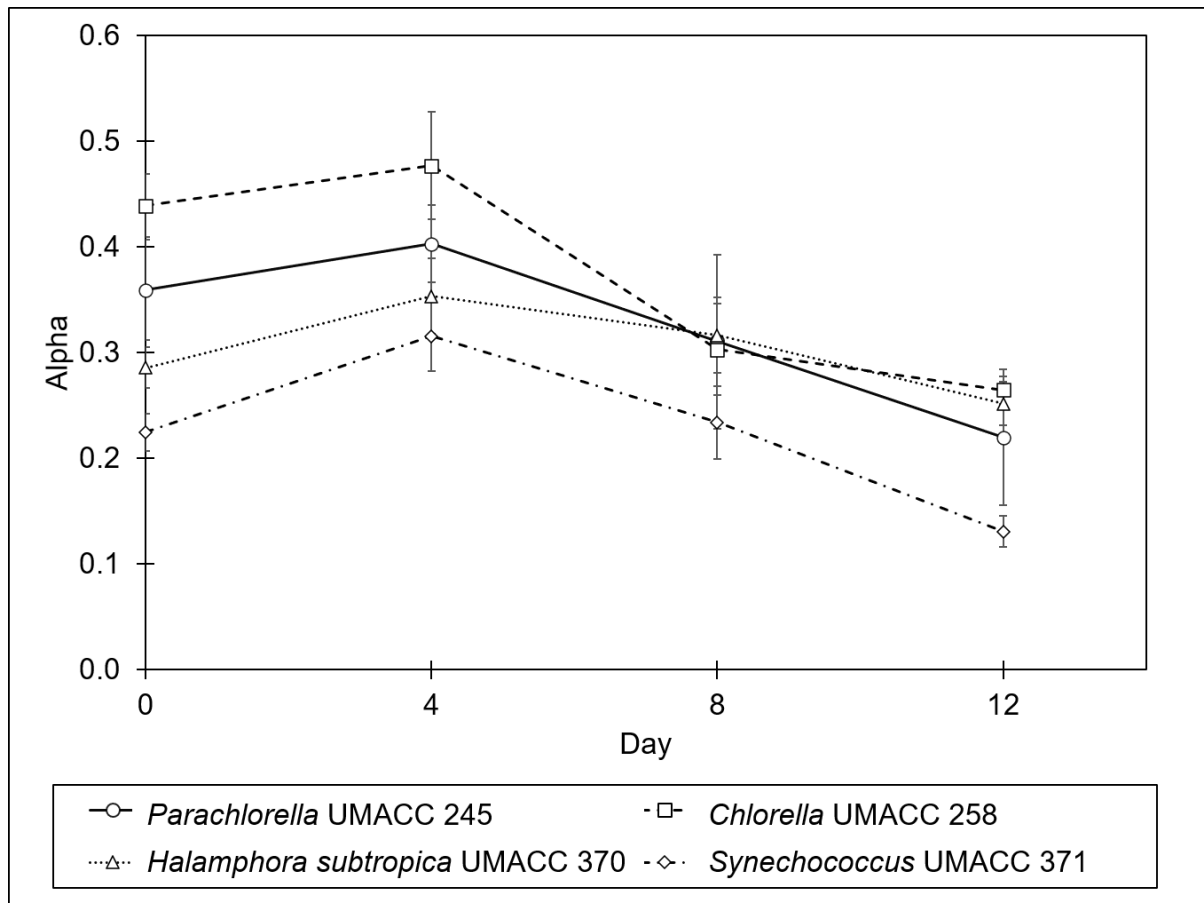

**Figure S3**  $rETR_{max}$  values for all strains on various days of the experiment; data as means  $\pm$  S.D. (n = 5)

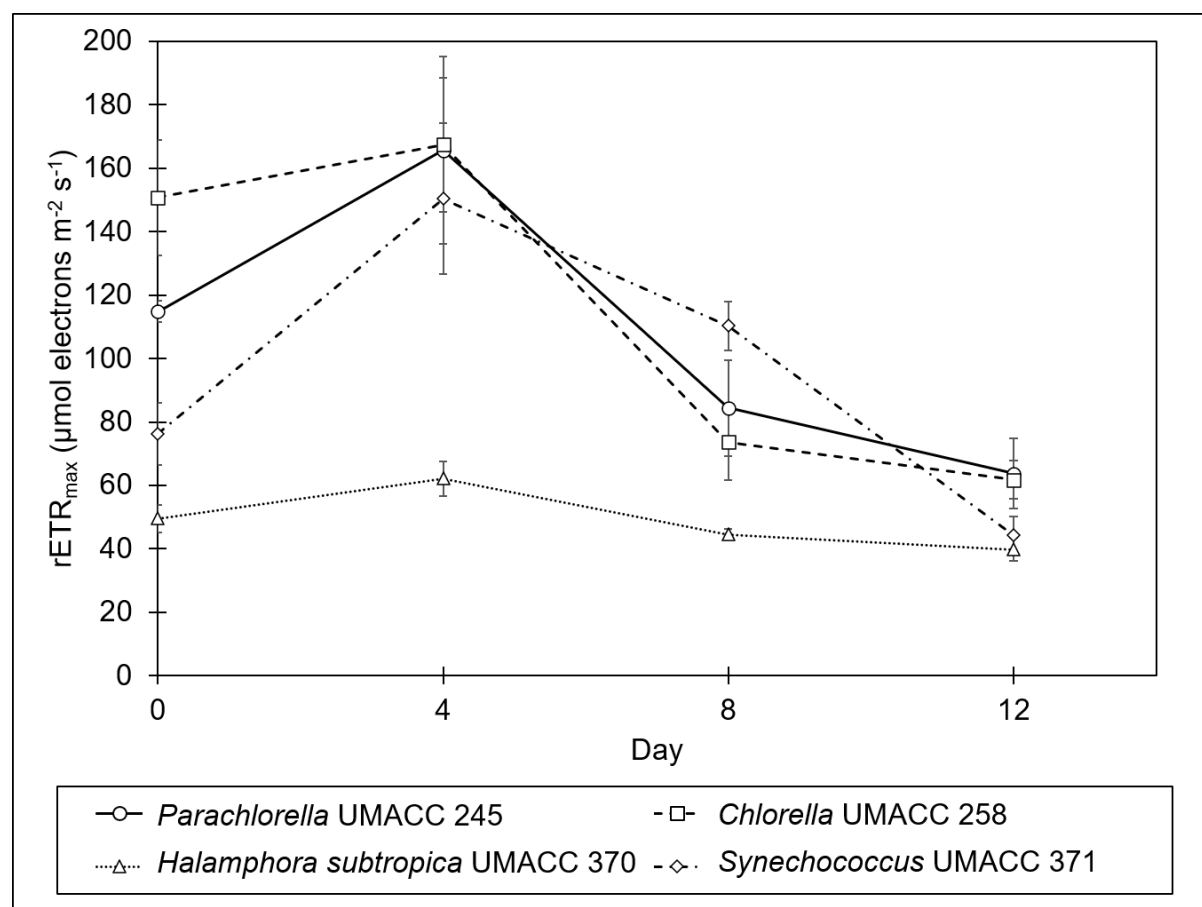

**Figure S4** Comparison of the  $E_k$  values between the microalgal strains on different days of the experiment; data as means  $\pm$  S.D. (n = 5)

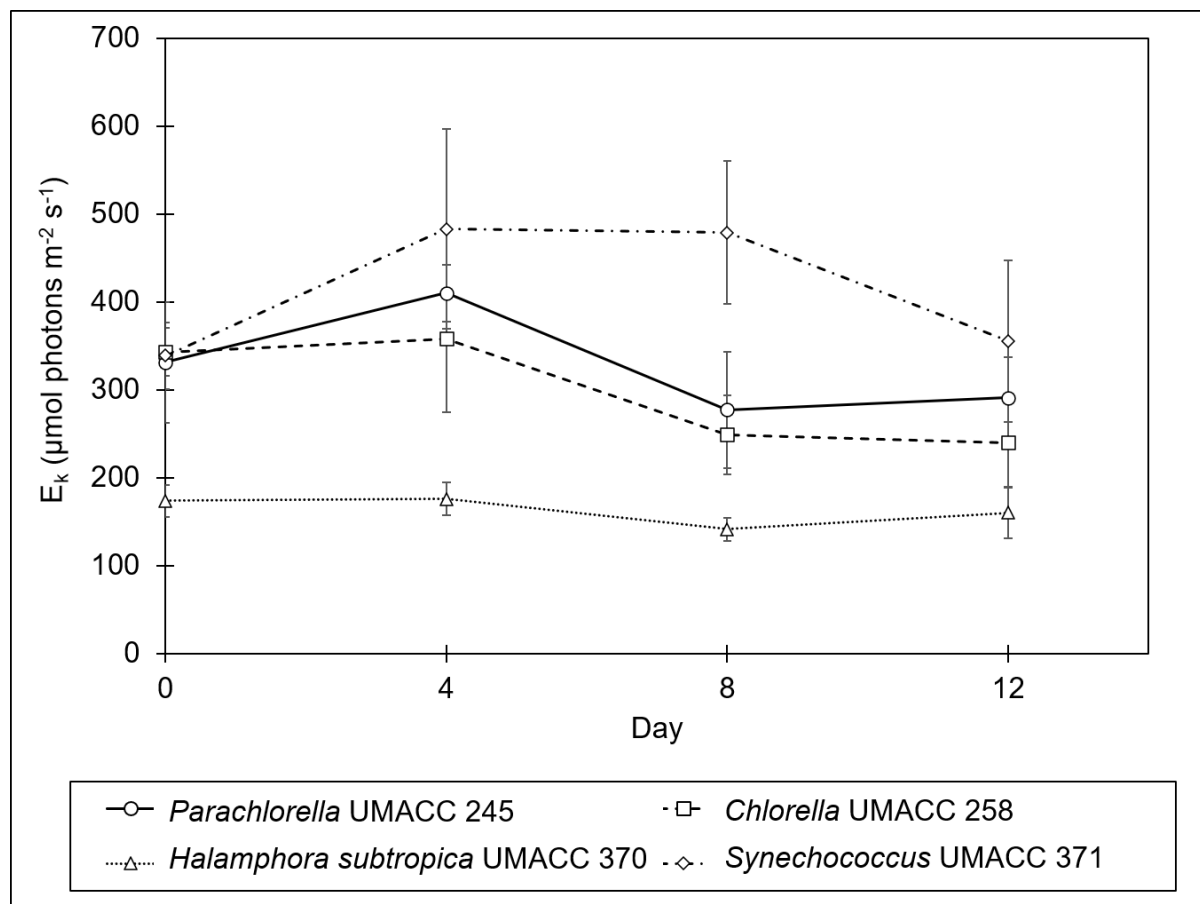

**Figure S5** Comparison of the NPQ values recorded by strains on Day 4 of experiment; data as means  $\pm$  S.D. (n = 5)

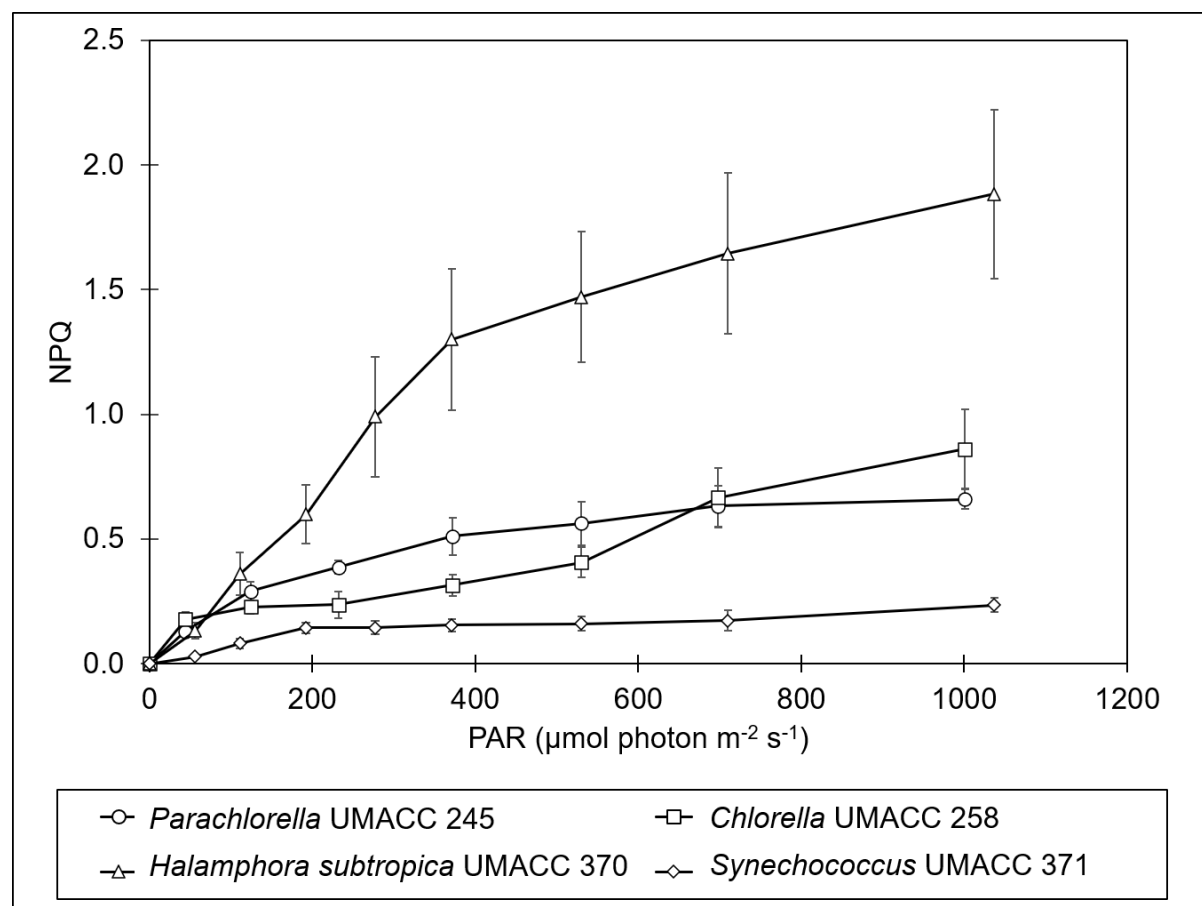

**Table S1** Highest values of maximum current density and maximum power density for all strains at irradiance level of  $90 \mu\text{mol photons m}^{-2} \text{s}^{-1}$ , data as means  $\pm$  S.D. (n = 5). Difference between alphabets indicate significant differences between different strains (ANOVA, Tukey HSD test,  $p < 0.05$ )

| Strain                                              | Maximum Current Density<br>( $\text{mA m}^{-2}$ ) | Maximum Power Density<br>( $\text{mW m}^{-2}$ ) |
|-----------------------------------------------------|---------------------------------------------------|-------------------------------------------------|
| <i>Parachlorella</i><br>UMACC 245                   | $0.423 \pm 0.037^c$                               | $0.017 \pm 0.002^c$                             |
| <i>Chlorella</i><br>UMACC 258                       | $1.412 \pm 0.124^a$                               | $0.108 \pm 0.023^a$                             |
| <i>Halamphora</i><br><i>subtropica</i><br>UMACC 370 | $1.164 \pm 0.075^b$                               | $0.090 \pm 0.018^{ab}$                          |
| <i>Synechococcus</i><br>UMACC 371                   | $1.157 \pm 0.104^b$                               | $0.065 \pm 0.015^b$                             |
| Control (Prov<br>medium only)                       | $1.36 \times 10^{-2} \pm 2.99 \times 10^{-3}^d$   | $1.56 \times 10^{-4} \pm 3.68 \times 10^{-8}^d$ |

**Table S2**  $F_v/F_m$  values for all strains on respective days of the experiment, data as means  $\pm$  S.D. (n = 5). Difference between alphabets indicate significant differences between different strains (ANOVA, Tukey HSD test,  $p < 0.05$ )

| Day | $F_v/F_m$ values for strain       |                               |                                                     |                                   |
|-----|-----------------------------------|-------------------------------|-----------------------------------------------------|-----------------------------------|
|     | <i>Parachlorella</i><br>UMACC 245 | <i>Chlorella</i><br>UMACC 258 | <i>Halamphora</i><br><i>subtropica</i><br>UMACC 370 | <i>Synechococcus</i><br>UMACC 371 |
| 0   | $0.437 \pm 0.047^{abc}$           | $0.466 \pm 0.030^{ab}$        | $0.342 \pm 0.019^{de}$                              | $0.244 \pm 0.018^{fg}$            |
| 4   | $0.494 \pm 0.037^a$               | $0.472 \pm 0.051^a$           | $0.379 \pm 0.036^{bcd}$                             | $0.284 \pm 0.033^{efg}$           |
| 8   | $0.370 \pm 0.082^{cde}$           | $0.361 \pm 0.043^{cde}$       | $0.348 \pm 0.036^{cde}$                             | $0.245 \pm 0.034^{fg}$            |
| 12  | $0.326 \pm 0.064^{def}$           | $0.229 \pm 0.013^g$           | $0.284 \pm 0.020^{efg}$                             | $0.116 \pm 0.014^h$               |

**Table S3** Alpha values for all strains on respective days of the experiment, data as means  $\pm$  S.D. (n = 5). Difference between alphabets indicate significant differences between different strains (ANOVA, Tukey HSD test,  $p < 0.05$ )

| Day | Alpha values for strain           |                                 |                                                     |                                   |
|-----|-----------------------------------|---------------------------------|-----------------------------------------------------|-----------------------------------|
|     | <i>Parachlorella</i><br>UMACC 245 | <i>Chlorella</i><br>UMACC 258   | <i>Halamphora</i><br><i>subtropica</i><br>UMACC 370 | <i>Synechococcus</i><br>UMACC 371 |
| 0   | 0.359 $\pm$ 0.080 <sup>bcd</sup>  | 0.439 $\pm$ 0.033 <sup>bc</sup> | 0.286 $\pm$ 0.016 <sup>de</sup>                     | 0.225 $\pm$ 0.012 <sup>ef</sup>   |
| 4   | 0.403 $\pm$ 0.044 <sup>abc</sup>  | 0.477 $\pm$ 0.063 <sup>a</sup>  | 0.354 $\pm$ 0.019 <sup>bcd</sup>                    | 0.316 $\pm$ 0.024 <sup>cde</sup>  |
| 8   | 0.311 $\pm$ 0.049 <sup>cde</sup>  | 0.303 $\pm$ 0.071 <sup>de</sup> | 0.317 $\pm$ 0.031 <sup>cde</sup>                    | 0.234 $\pm$ 0.030 <sup>e</sup>    |
| 12  | 0.220 $\pm$ 0.032 <sup>ef</sup>   | 0.265 $\pm$ 0.050 <sup>de</sup> | 0.252 $\pm$ 0.028 <sup>e</sup>                      | 0.131 $\pm$ 0.039 <sup>f</sup>    |



**Table S4** rETR<sub>max</sub> for all strains on respective days of the experiment, data as means  $\pm$  S.D. (n = 5). Difference between alphabets indicate significant differences between different strains (ANOVA, Tukey HSD test,  $p < 0.05$ )

| Day | rETR <sub>max</sub> values for strain ( $\mu\text{mol electrons m}^{-2} \text{s}^{-1}$ ) |                                       |                                                     |                                      |
|-----|------------------------------------------------------------------------------------------|---------------------------------------|-----------------------------------------------------|--------------------------------------|
|     | <i>Parachlorella</i><br>UMACC 245                                                        | <i>Chlorella</i><br>UMACC 258         | <i>Halamphora</i><br><i>subtropica</i><br>UMACC 370 | <i>Synechococcus</i><br>UMACC 371    |
| 0   | 114.821 $\pm$<br>3.389 <sup>b</sup>                                                      | 150.773 $\pm$<br>18.289 <sup>a</sup>  | 49.549 $\pm$<br>4.409 <sup>def</sup>                | 76.283 $\pm$<br>9.819 <sup>cd</sup>  |
| 4   | 165.683 $\pm$<br>29.496 <sup>a</sup>                                                     | 167.449 $\pm$<br>21.068 <sup>a</sup>  | 62.139 $\pm$<br>5.476 <sup>cdef</sup>               | 150.411 $\pm$<br>23.891 <sup>a</sup> |
| 8   | 84.393 $\pm$<br>15.199 <sup>bc</sup>                                                     | 73.609 $\pm$<br>11.853 <sup>def</sup> | 44.532 $\pm$<br>1.659 <sup>ef</sup>                 | 110.263 $\pm$<br>7.794 <sup>b</sup>  |
| 12  | 63.690 $\pm$<br>11.106 <sup>cdef</sup>                                                   | 61.741 $\pm$<br>6.096 <sup>cdef</sup> | 39.749 $\pm$<br>3.682 <sup>f</sup>                  | 44.165 $\pm$<br>5.895 <sup>ef</sup>  |

**Table S5** E<sub>k</sub> for all strains on respective days of the experiment; data as means  $\pm$  S.D. (n = 5). Difference between alphabets indicate significant differences between different strains (ANOVA, Tukey HSD test,  $p < 0.05$ )

| Day | E <sub>k</sub> for strain ( $\mu\text{mol photons m}^{-2} \text{s}^{-1}$ ) |                                        |                                                     |                                        |
|-----|----------------------------------------------------------------------------|----------------------------------------|-----------------------------------------------------|----------------------------------------|
|     | <i>Parachlorella</i><br>UMACC 245                                          | <i>Chlorella</i><br>UMACC 258          | <i>Halamphora</i><br><i>subtropica</i><br>UMACC 370 | <i>Synechococcus</i><br>UMACC 371      |
| 0   | 331.650 $\pm$<br>68.741 <sup>bc</sup>                                      | 342.927 $\pm$<br>27.256 <sup>bc</sup>  | 173.740 $\pm$<br>18.564 <sup>de</sup>               | 338.957 $\pm$<br>37.817 <sup>bc</sup>  |
| 4   | 410.219 $\pm$<br>32.031 <sup>ab</sup>                                      | 358.240 $\pm$<br>84.023 <sup>abc</sup> | 176.148 $\pm$<br>18.410 <sup>de</sup>               | 483.111 $\pm$<br>113.587 <sup>a</sup>  |
| 8   | 277.330 $\pm$<br>66.238 <sup>bcd</sup>                                     | 249.161 $\pm$<br>44.840 <sup>cde</sup> | 141.614 $\pm$<br>12.884 <sup>e</sup>                | 478.755 $\pm$<br>81.303 <sup>a</sup>   |
| 12  | 291.356 $\pm$<br>46.063 <sup>bcd</sup>                                     | 239.881 $\pm$<br>49.794 <sup>cde</sup> | 160.254 $\pm$<br>28.993 <sup>de</sup>               | 355.525 $\pm$<br>91.491 <sup>abc</sup> |
